# Supplementary material for: Enantiopure synthesis of 7-(1-pyrindanyl)propargyl ethers as rasagiline analogues via chemical or enzymatic resolution of 1-pyrindan-7-ol
Source: Royal Society of Chemistry journal article supplement (doi:10.1039/c5ra24868j), 2015-01-01
Supplement: c5ra24868j1.pdf [file c5ra24868j1.pdf]

# Enantiopure synthesis of 7-(1-pyrindanyl) propargyl ethers as rasagiline analogues *via* chemical or enzymatic resolution of 1-pyrindan- 7-ol

*Carlos A. D. Sousa,<sup>a\*</sup> Ivo E. Sampaio-Dias,<sup>b</sup> Fabio Rizzo-Aguiar,<sup>b</sup> Xerardo Garcia-Mera,<sup>c</sup>  
José E. Rodríguez-Borges<sup>b</sup>*

<sup>a</sup> REQUIMTE/LAQV, Departamento de Química e Bioquímica da Universidade do Porto,  
Rua do Campo Alegre, 4169-007 Porto, Portugal

<sup>b</sup> REQUIMTE/UCIBIO, Departamento de Química e Bioquímica da Universidade do Porto,  
Rua do Campo Alegre, 4169-007 Porto, Portugal

<sup>c</sup> Departamento de Química Orgánica, Facultade de Farmacia, Universidade de Santiago de  
Compostela, E-15782 Santiago de Compostela, Spain

## Electronic Supplementary Information

### Table of contents

|                                                        |       |
|--------------------------------------------------------|-------|
| <sup>1</sup> H and <sup>13</sup> C-NMR spectra .....   | SI-2  |
| Crystallographic data for the structure <b>9</b> ..... | SI-8  |
| Chiral HPLC chromatograms.....                         | SI-11 |

\*Corresponding author: [carlos.sousa@fc.up.pt](mailto:carlos.sousa@fc.up.pt)

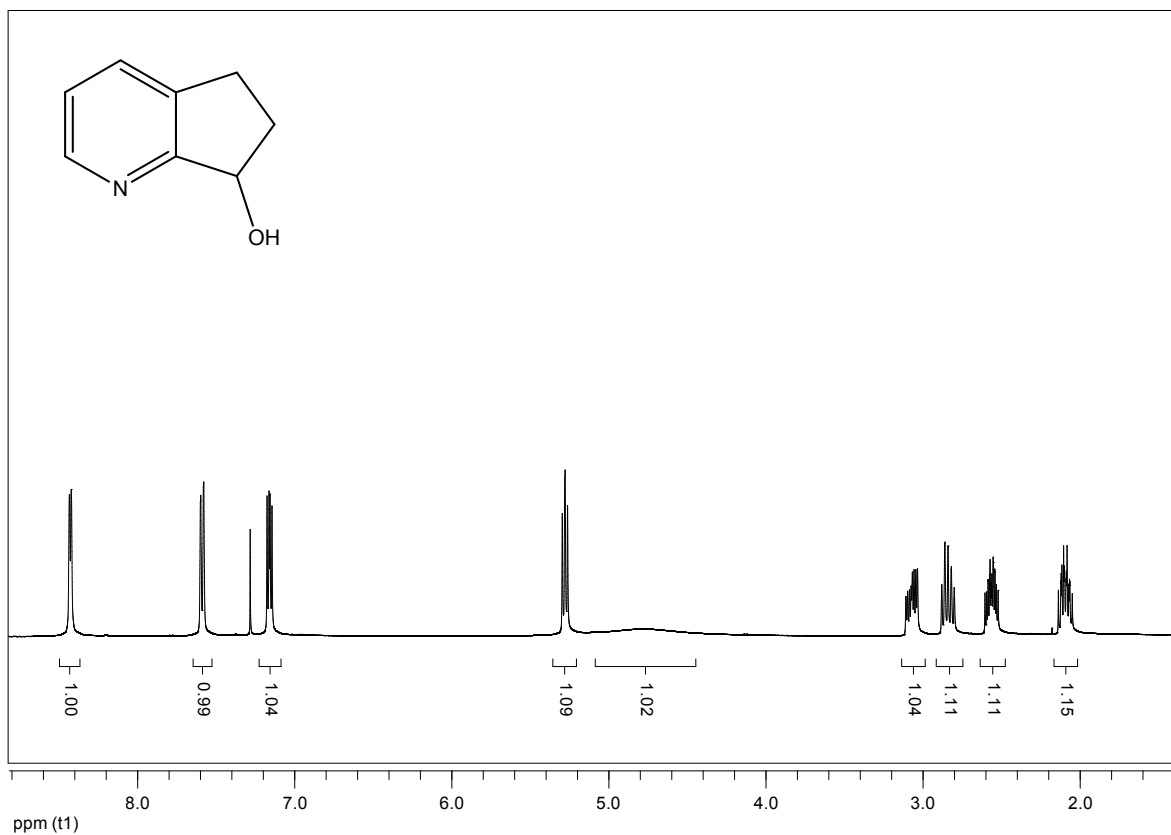

**Figure 1.** <sup>1</sup>H-NMR spectrum of compound (±)-3.

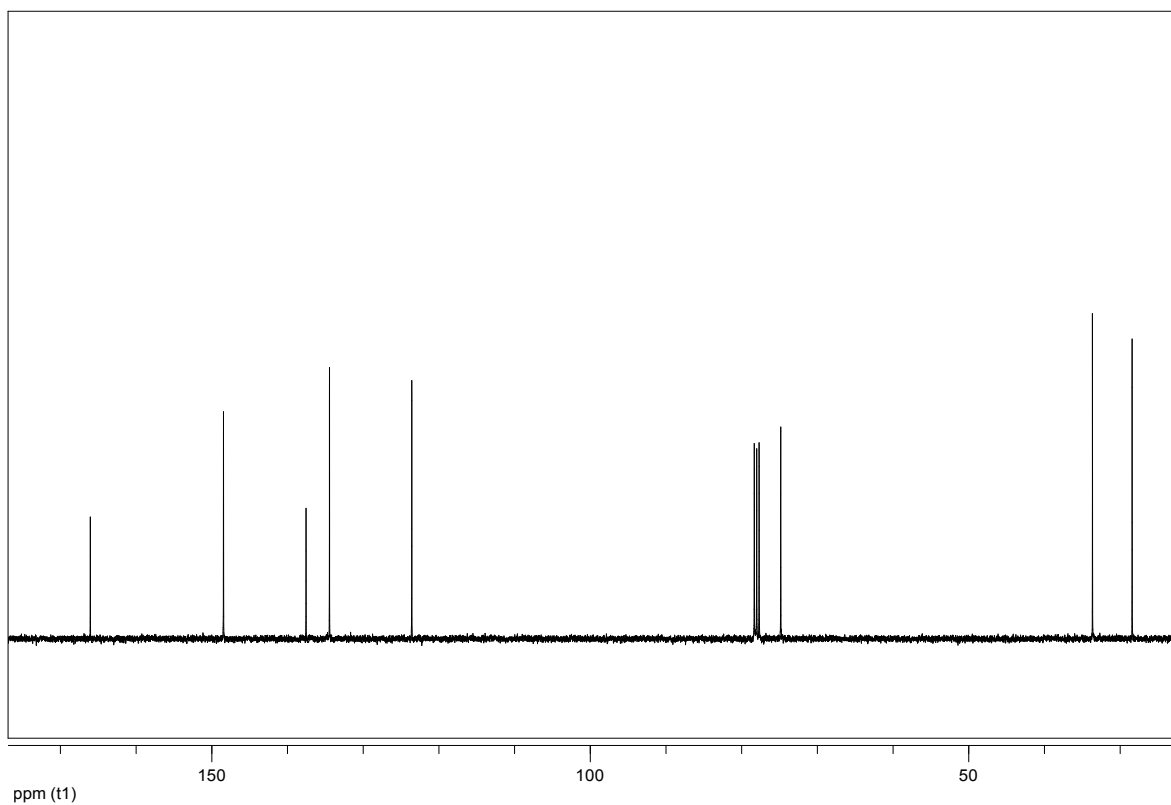

**Figure 2.** <sup>13</sup>C-NMR spectrum of compound (±)-3.

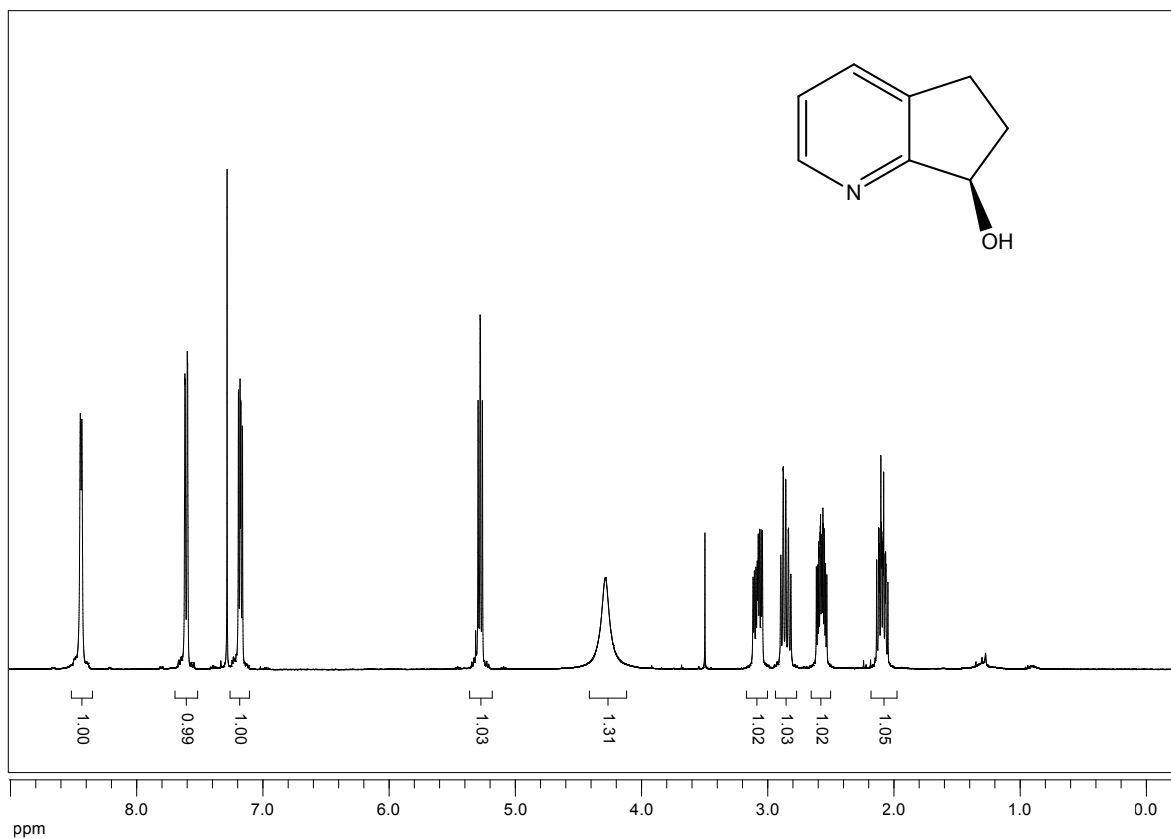

**Figure 3.** <sup>1</sup>H-NMR spectrum of compound (+)-3.

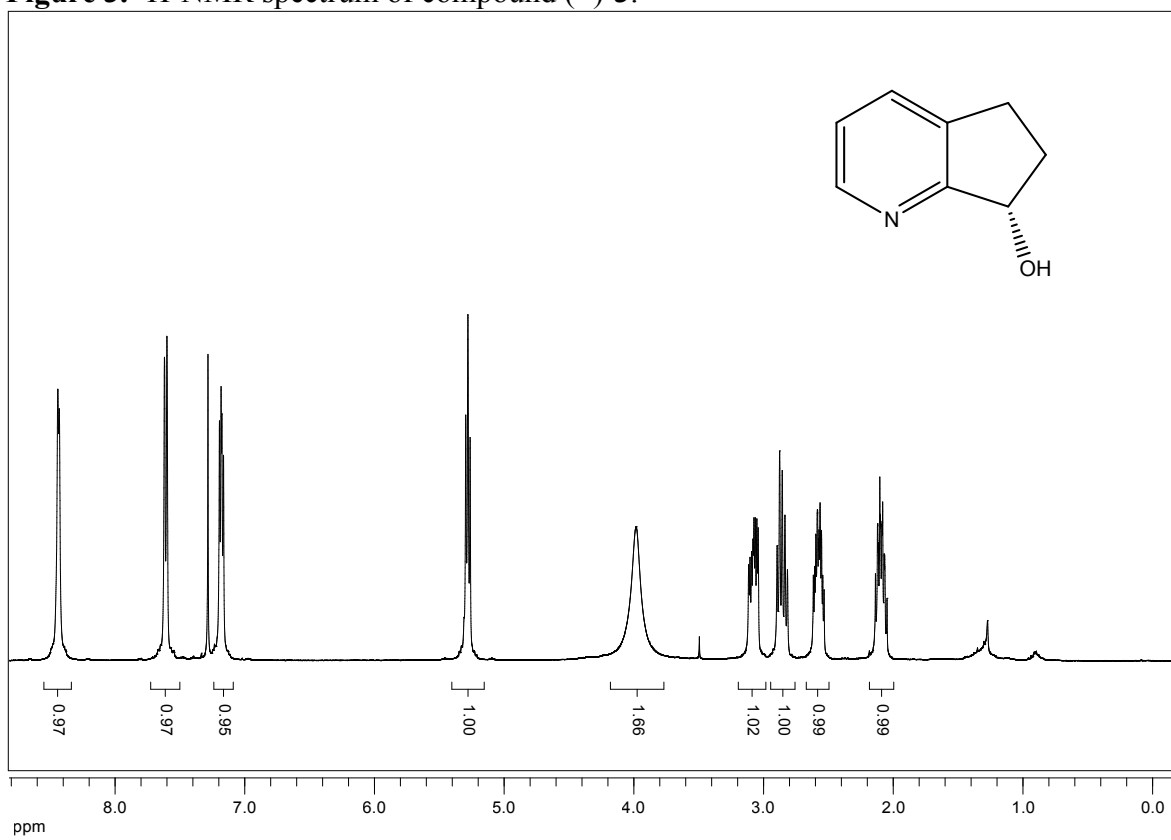

**Figure 4.** <sup>1</sup>H-NMR spectrum of compound (-)-3.

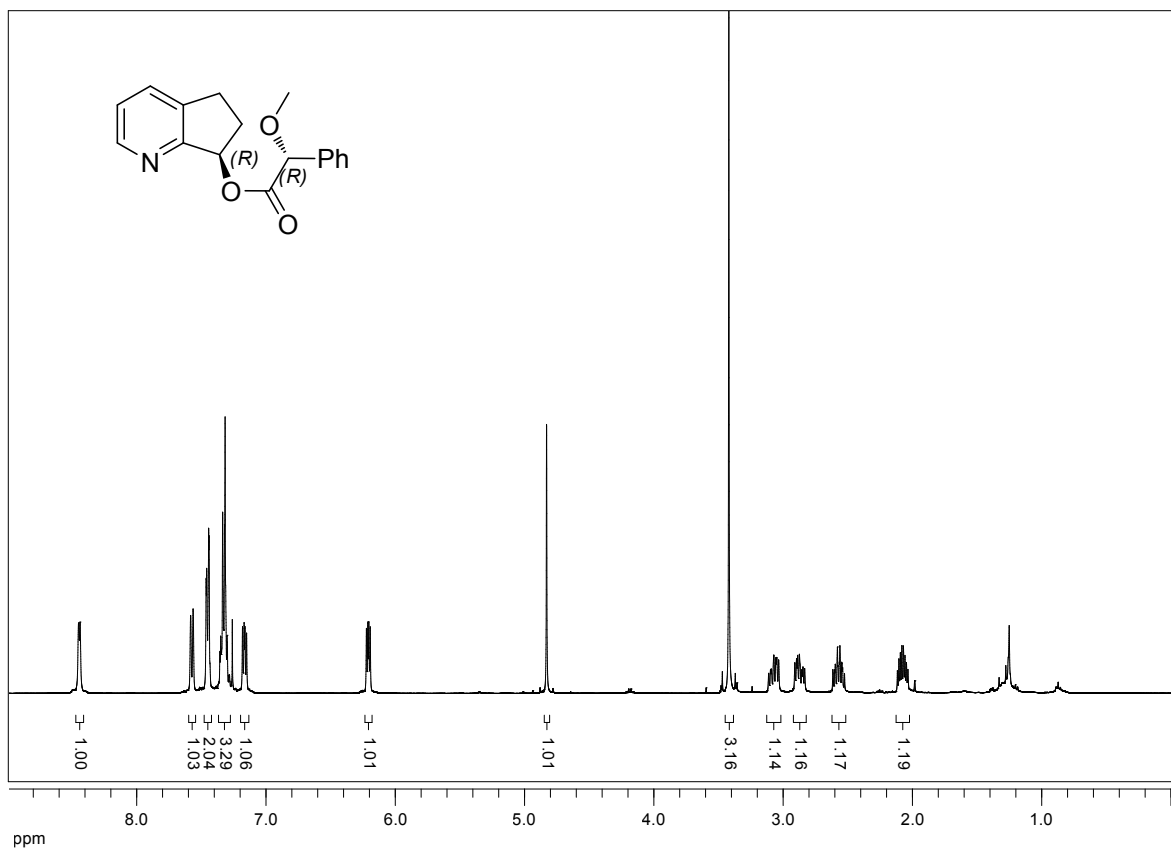

**Figure 5.** <sup>1</sup>H-NMR spectrum of compound 7a.

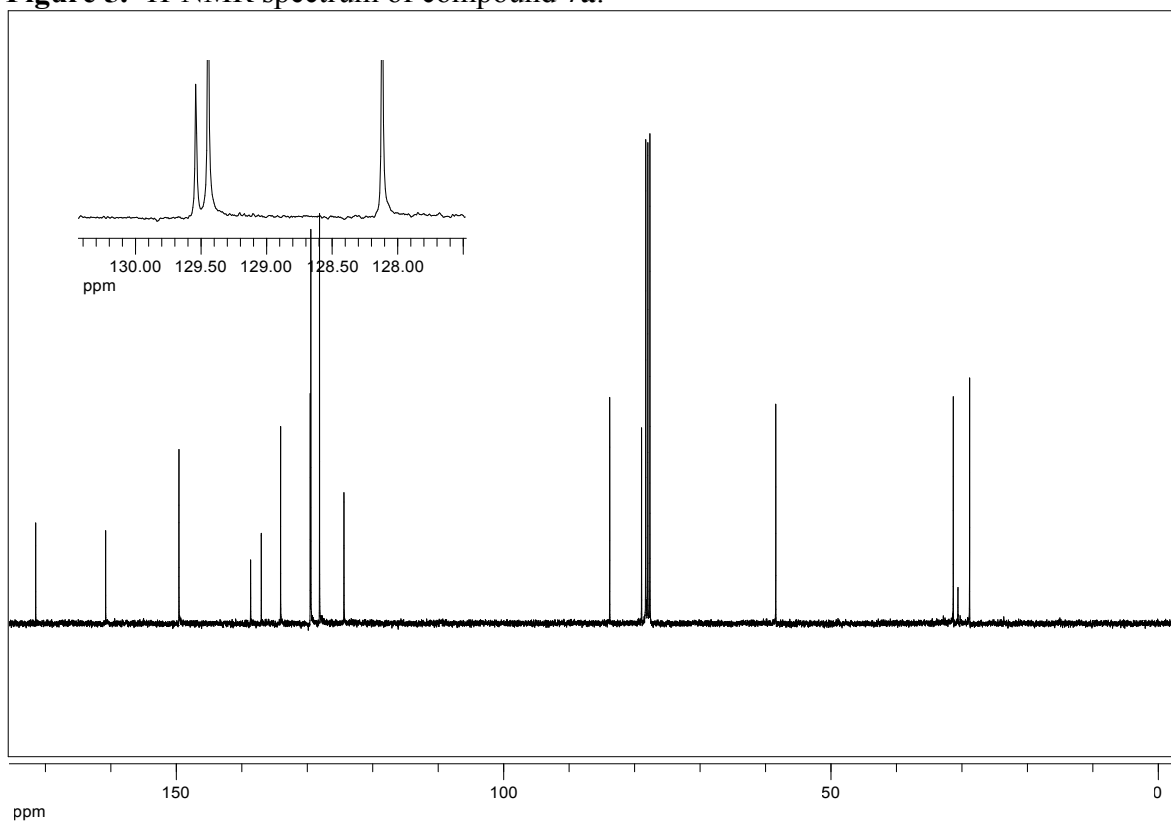

**Figure 6.** <sup>13</sup>C-NMR spectrum of compound 7a/8a.

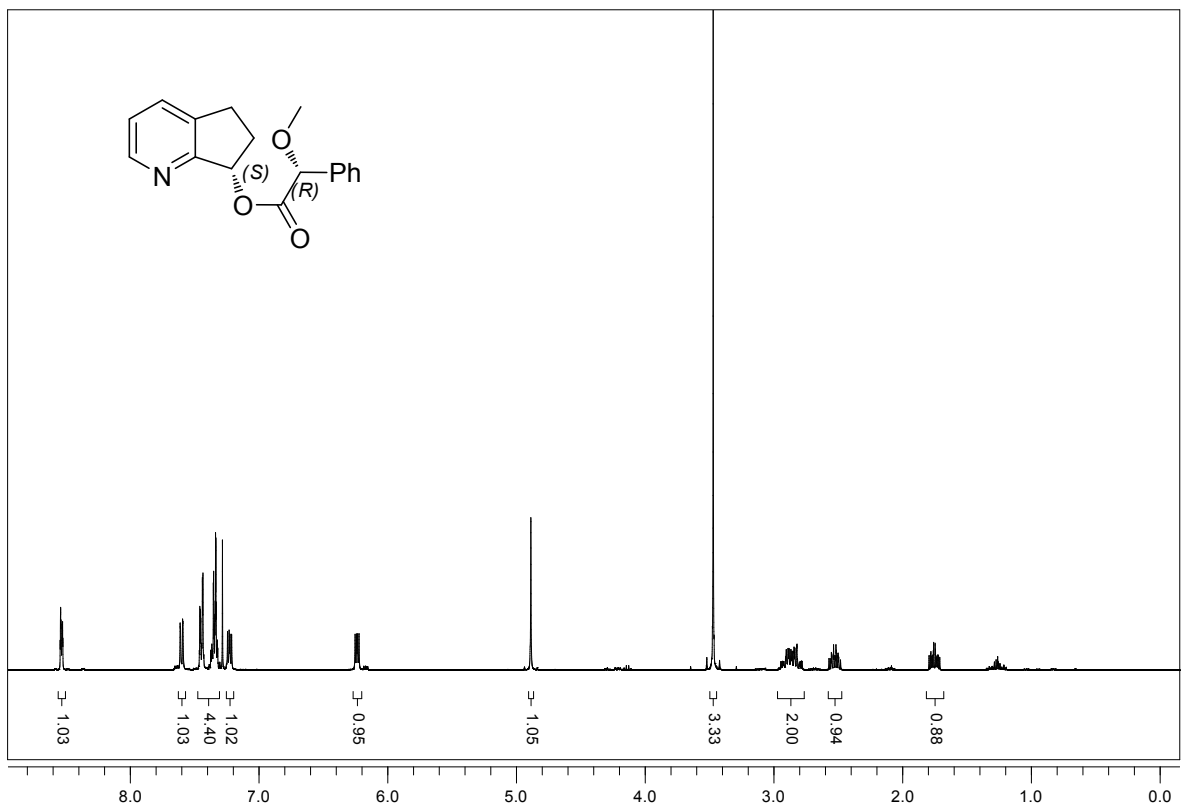

**Figure 7.**  $^1\text{H-NMR}$  spectrum of compound **7b**.

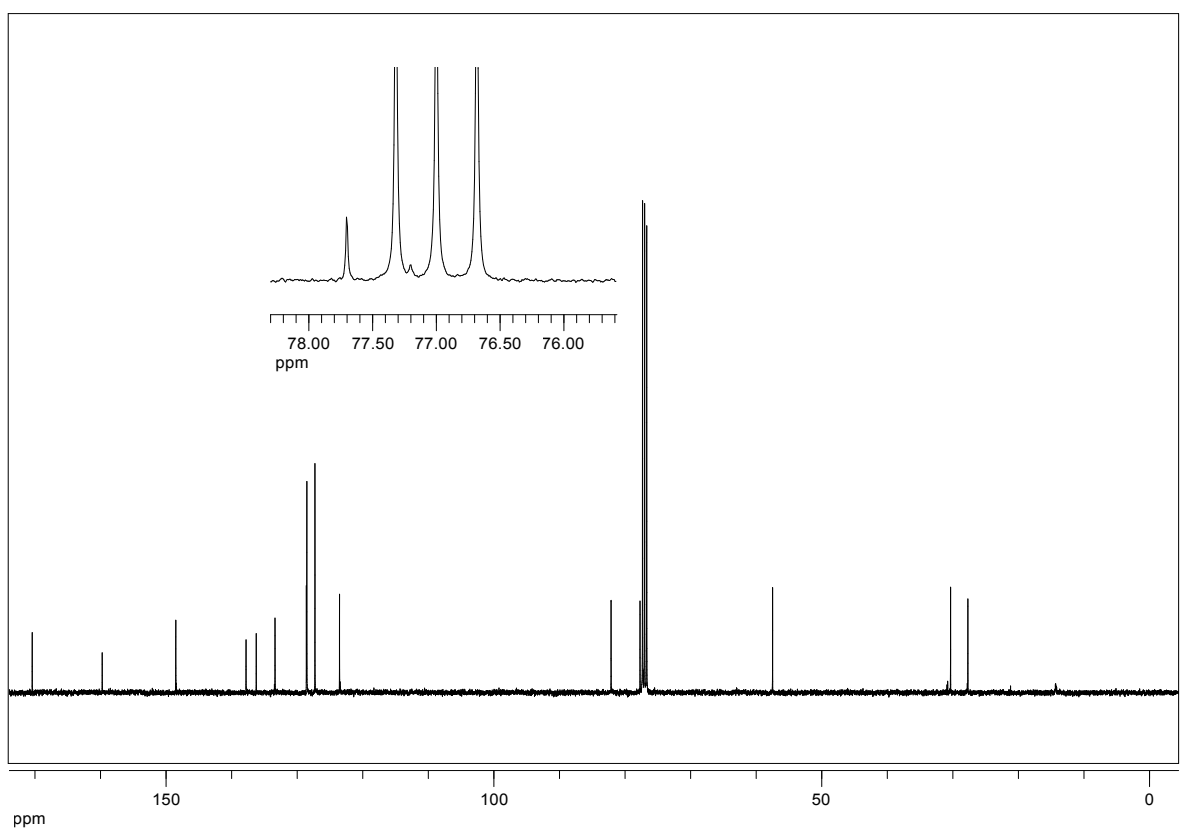

**Figure 8.**  $^{13}\text{C-NMR}$  spectrum of compound **7b/8b**.

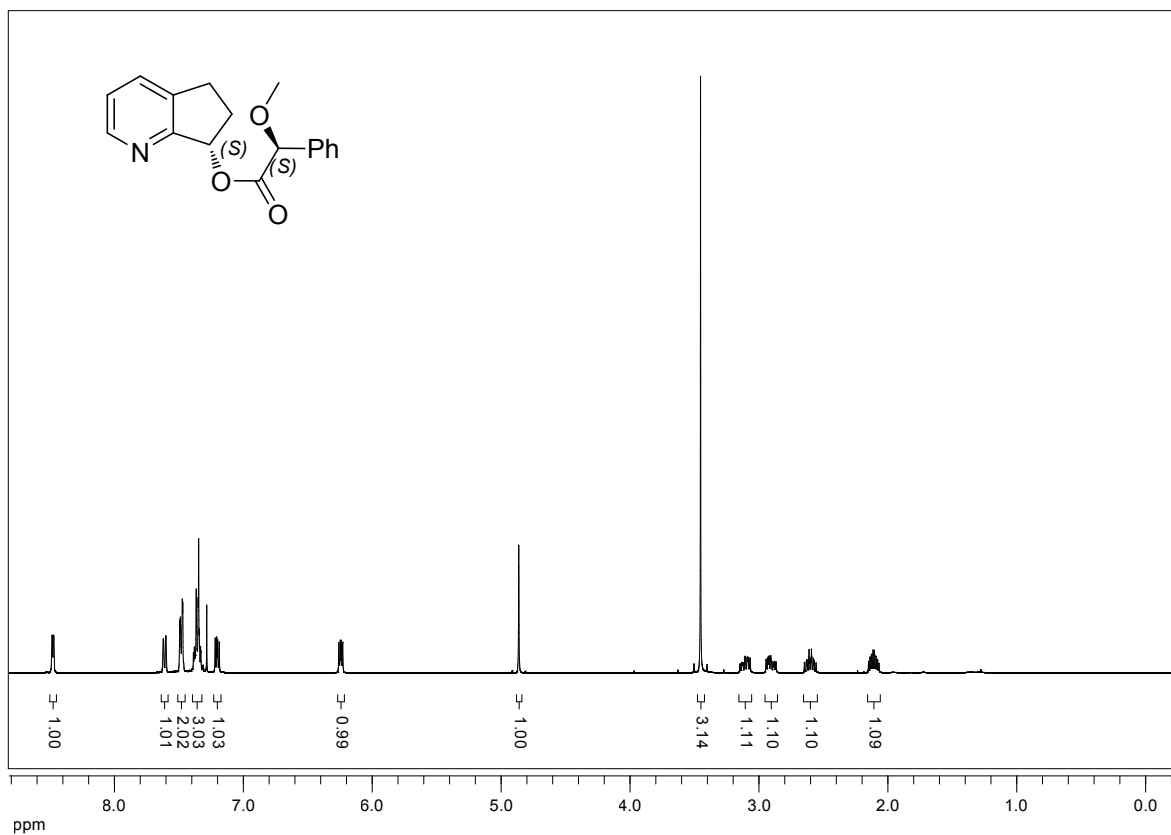

**Figure 9.**  $^1\text{H-NMR}$  spectrum of compound **8a**.

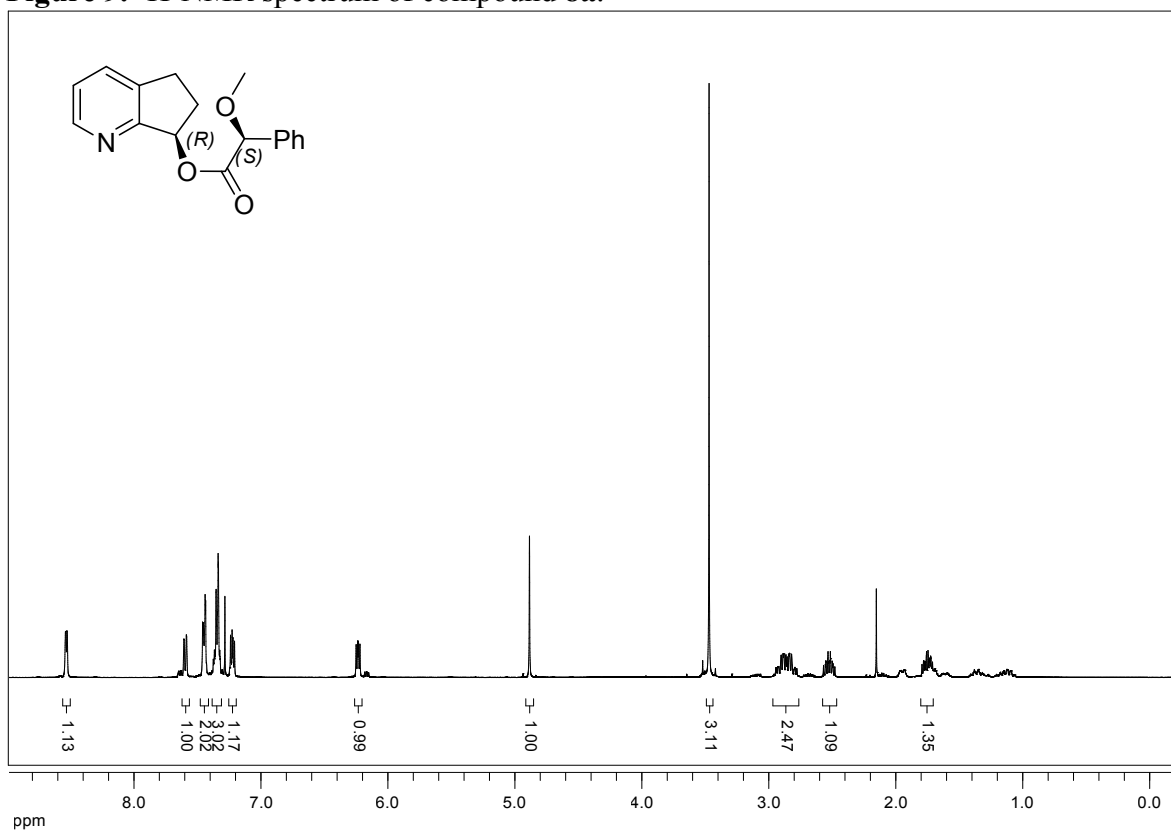

**Figure 10.**  $^1\text{H-NMR}$  spectrum of compound **8b**.

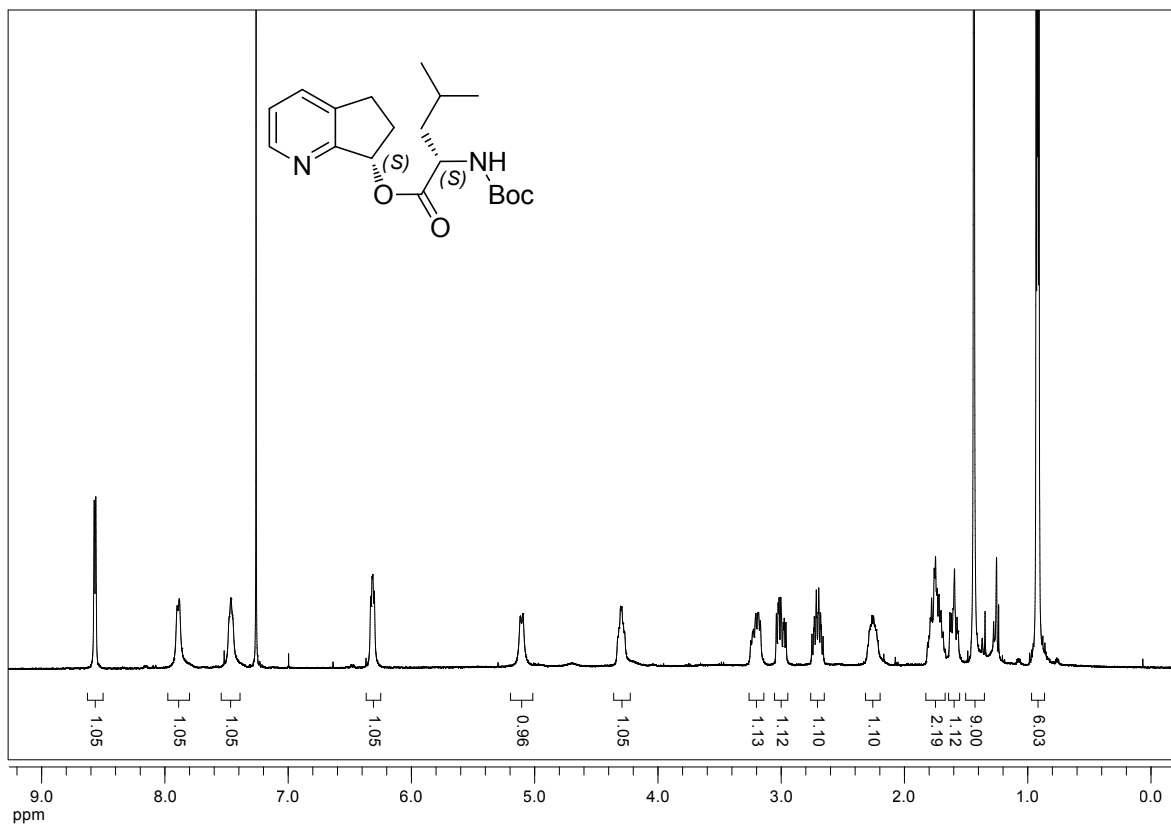

**Figure 11.** <sup>1</sup>H-NMR spectrum of compound 9.

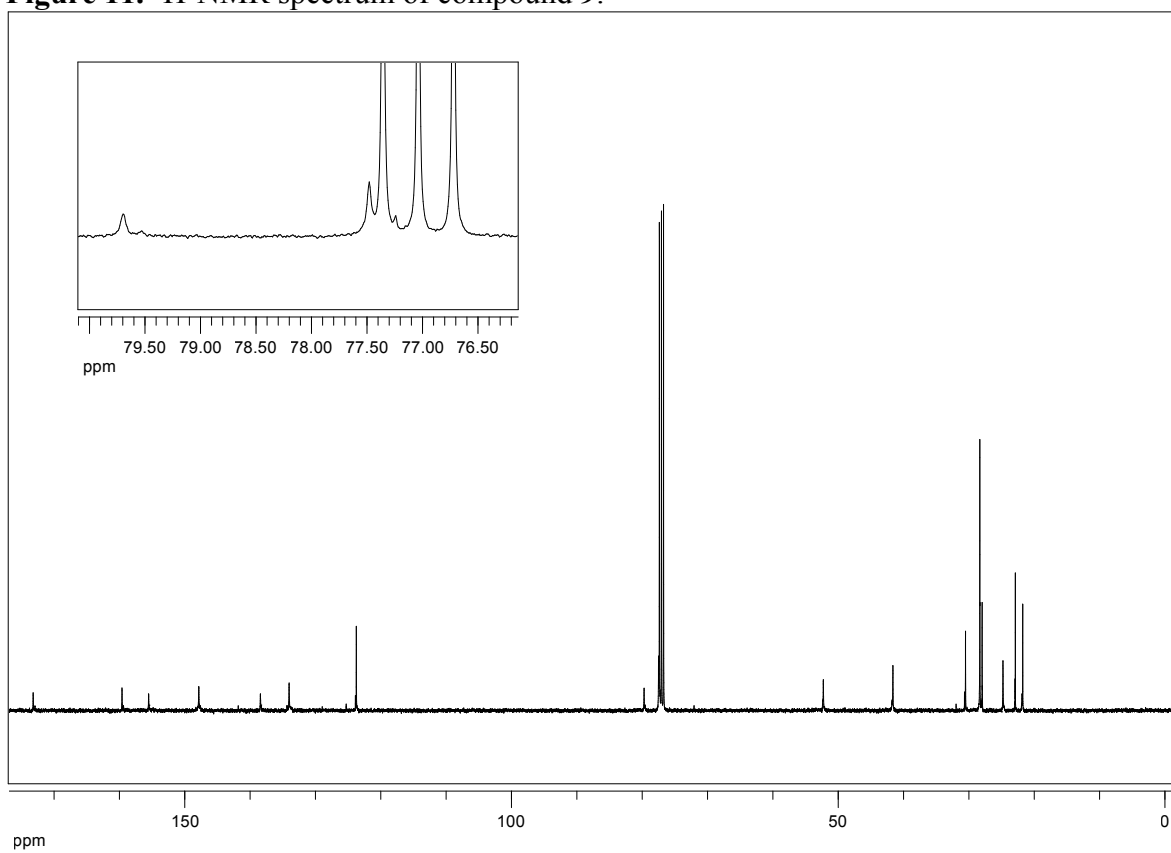

**Figure 12.** <sup>13</sup>C-NMR spectrum of compound 9.

**Table 1.** Crystal data and structure refinement for **9**.

|                                   |                                                               |                 |
|-----------------------------------|---------------------------------------------------------------|-----------------|
| Identification code               | 9                                                             |                 |
| Empirical formula                 | C <sub>19</sub> H <sub>28</sub> N <sub>2</sub> O <sub>4</sub> |                 |
| Formula weight                    | 348.43                                                        |                 |
| Temperature                       | 100(2) K                                                      |                 |
| Wavelength                        | 0.71073 Å                                                     |                 |
| Crystal system                    | Monoclinic                                                    |                 |
| Space group                       | P2 <sub>1</sub>                                               |                 |
| Unit cell dimensions              | a = 11.1067(5) Å                                              | α = 90°         |
|                                   | b = 8.7283(3) Å                                               | β = 113.959(2)° |
|                                   | c = 11.1168(5) Å                                              | γ = 90°         |
| Volume                            | 984.83(7) Å <sup>3</sup>                                      |                 |
| Z                                 | 2                                                             |                 |
| Density (calculated)              | 1.175 Mg/m <sup>3</sup>                                       |                 |
| Absorption coefficient            | 0.082 mm <sup>-1</sup>                                        |                 |
| F(000)                            | 376                                                           |                 |
| Crystal size                      | 0.800 x 0.540 x 0.170 mm <sup>3</sup>                         |                 |
| Theta range for data collection   | 2.005 to 33.196°                                              |                 |
| Index ranges                      | -17 ≤ h ≤ 16, -13 ≤ k ≤ 13, -16 ≤ l ≤ 17                      |                 |
| Reflections collected             | 46898                                                         |                 |
| Independent reflections           | 7403 [R(int) = 0.0377]                                        |                 |
| Completeness to theta = 25.242°   | 100.0 %                                                       |                 |
| Refinement method                 | Full-matrix least-squares on F <sup>2</sup>                   |                 |
| Data / restraints / parameters    | 7403 / 1 / 234                                                |                 |
| Goodness-of-fit on F <sup>2</sup> | 1.025                                                         |                 |
| Final R indices [I > 2σ(I)]       | R1 = 0.0386, wR2 = 0.0900                                     |                 |
| R indices (all data)              | R1 = 0.0464, wR2 = 0.0940                                     |                 |
| Absolute structure parameter      | 0.2(2)                                                        |                 |
| Largest diff. peak and hole       | 0.297 and -0.224 e.Å <sup>-3</sup>                            |                 |

The crystallographic data for the structure **9** have been deposited at the Cambridge Crystallographic Data Center as supplementary publication number CCDC 1404442.



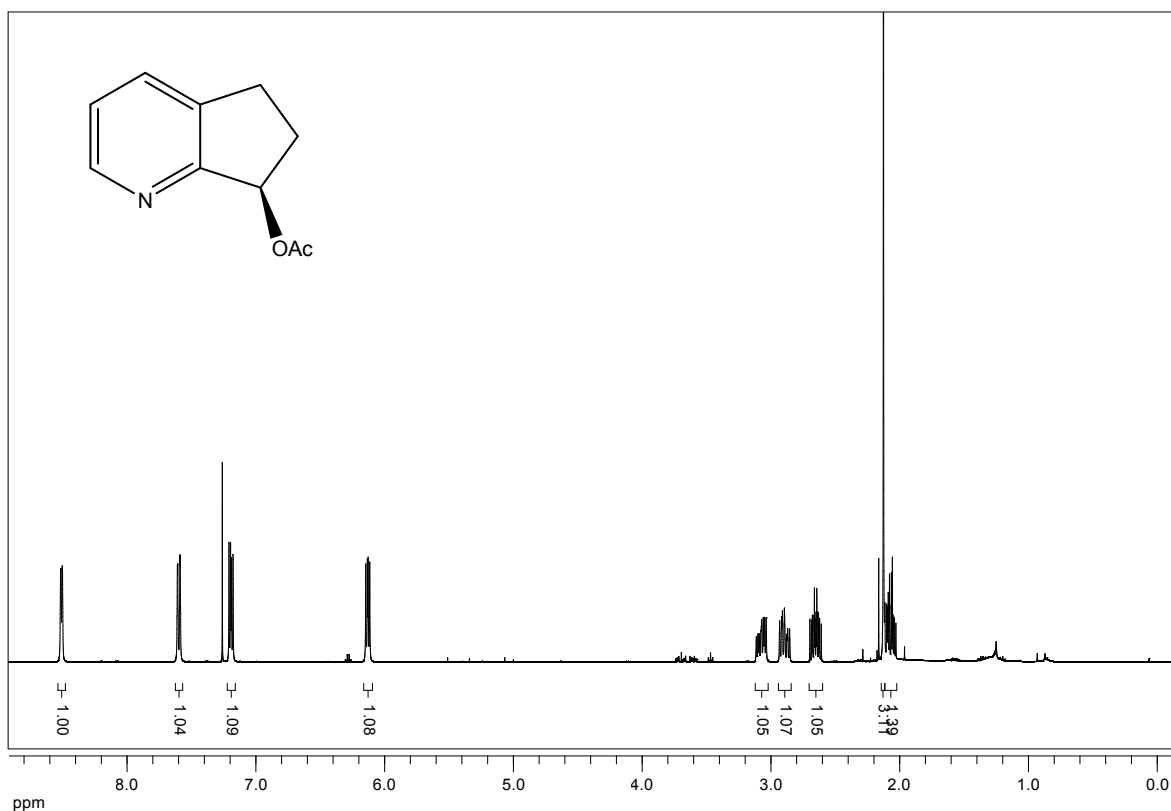

**Figure 13.**  $^1\text{H-NMR}$  spectrum of compound (-)-6.

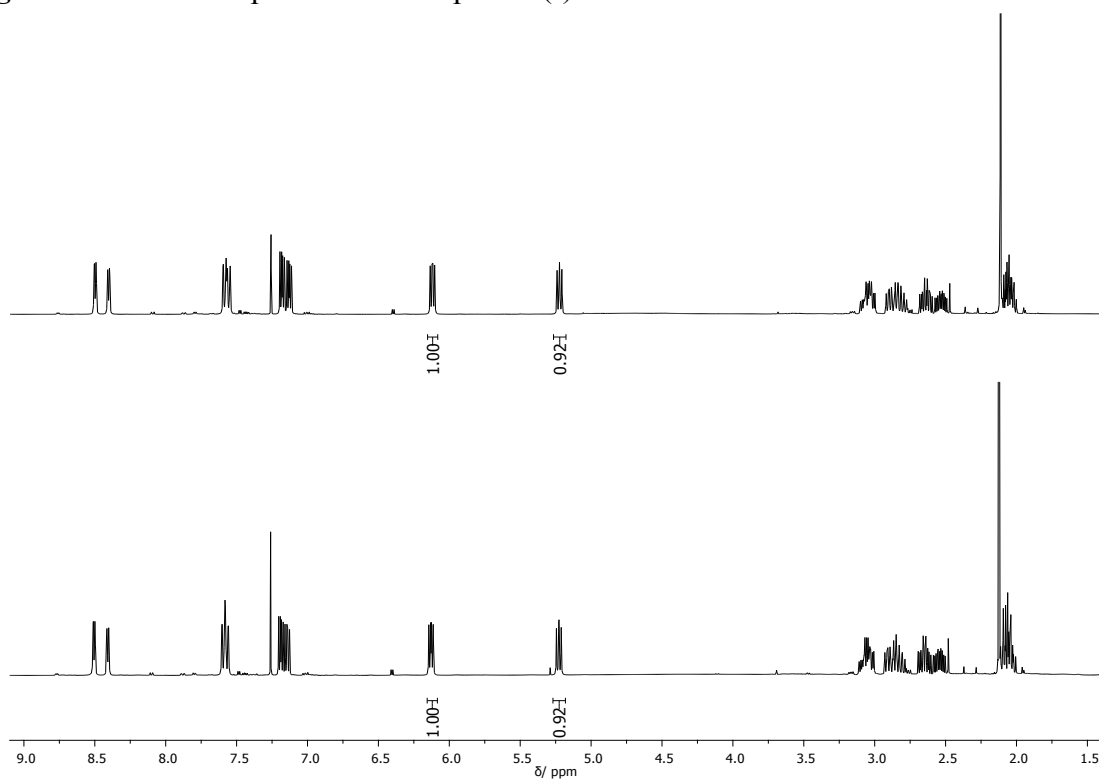

**Figure 14.**  $^1\text{H-NMR}$  spectra of a filtered and dried sample from the reaction mixture of the enzymatic hydrolysis reaction after 18 h (above) and 48 h (bottom). The alcohol **3**/acetate **6** ratio found by spectra integration is 48:52.

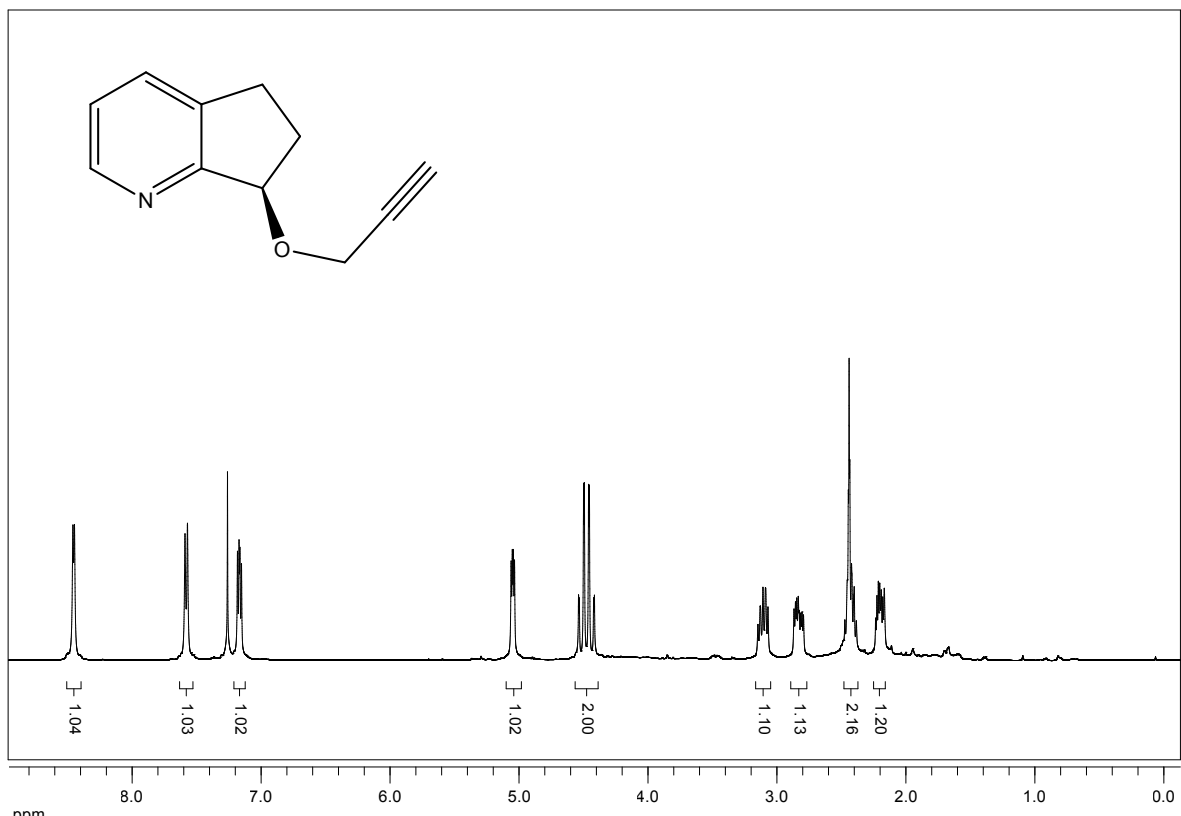

**Figure 15.** <sup>1</sup>H-NMR spectrum of compound (-)-2.

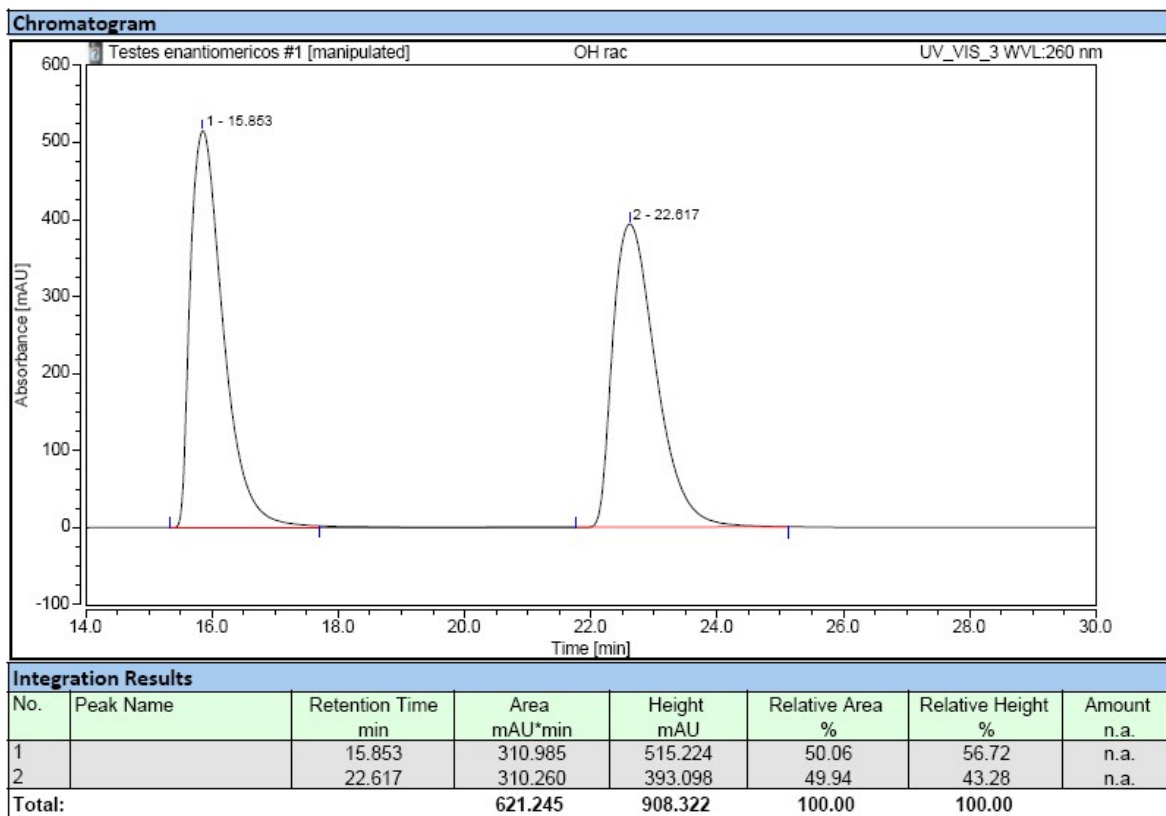

**Figure 16.** Chromatogram of racemic 3.

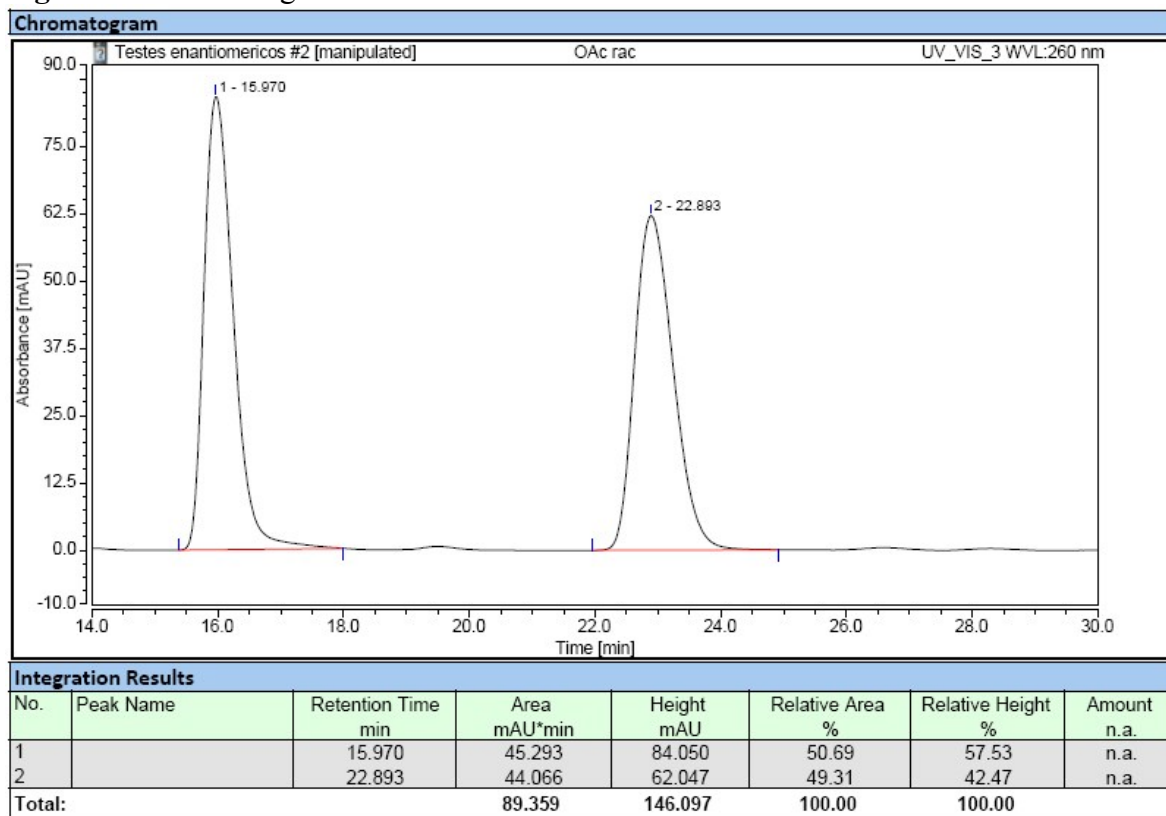

**Figure 16.** Chromatogram of racemic 6.

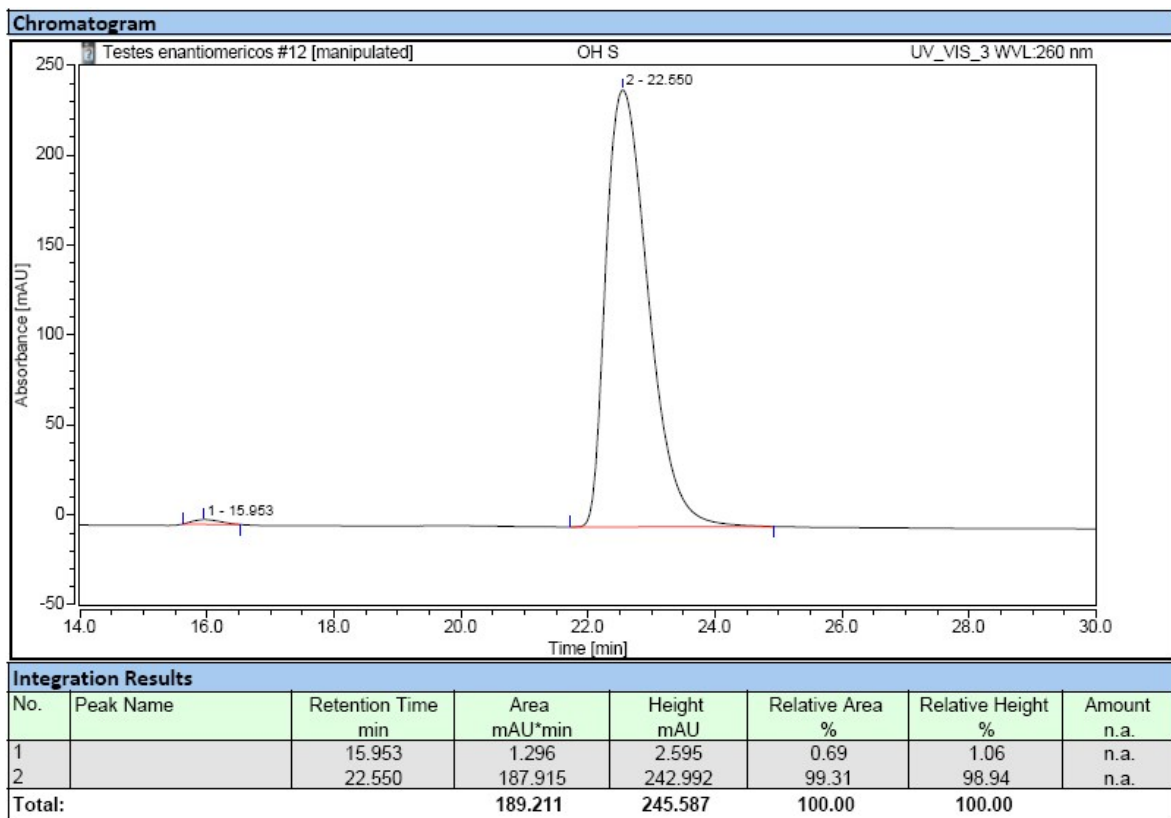

**Figure 17.** Chromatogram of (*S*)-3 obtained from chemical resolution.

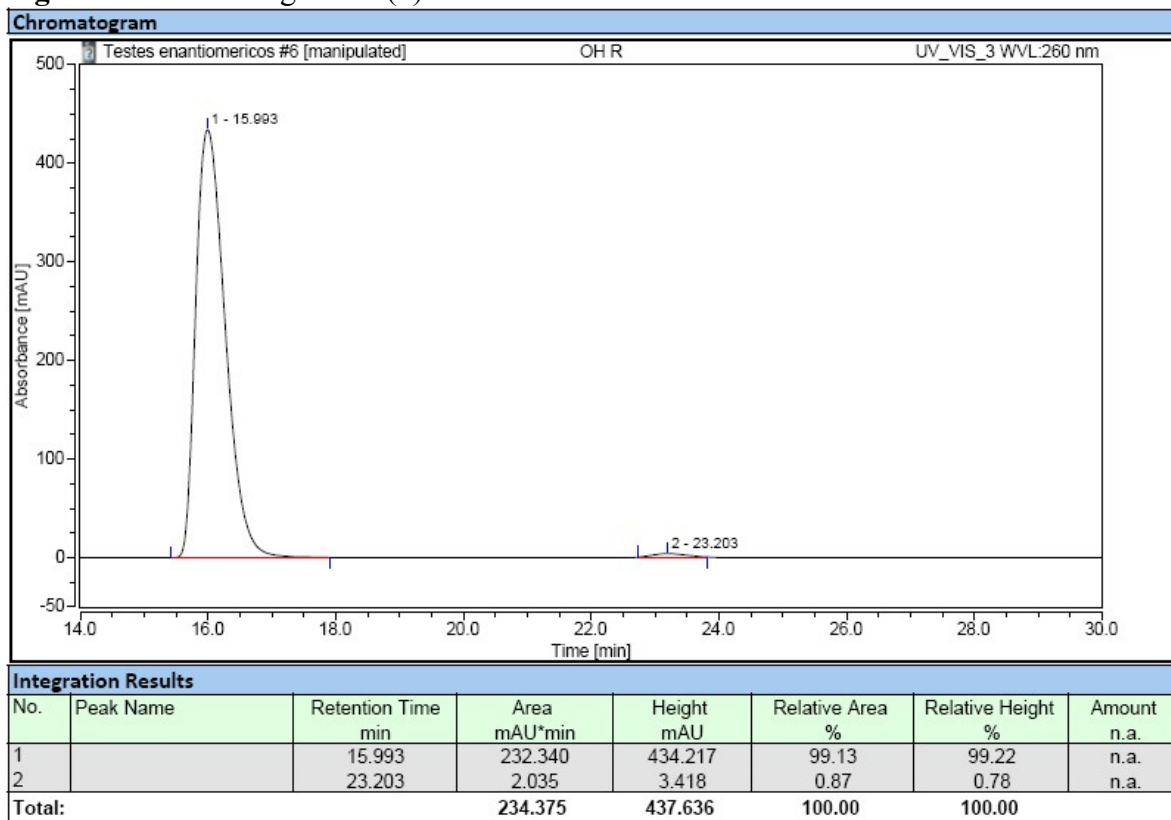

**Figure 18.** Chromatogram of (*R*)-3 obtained from enzymatic hydrolysis resolution.

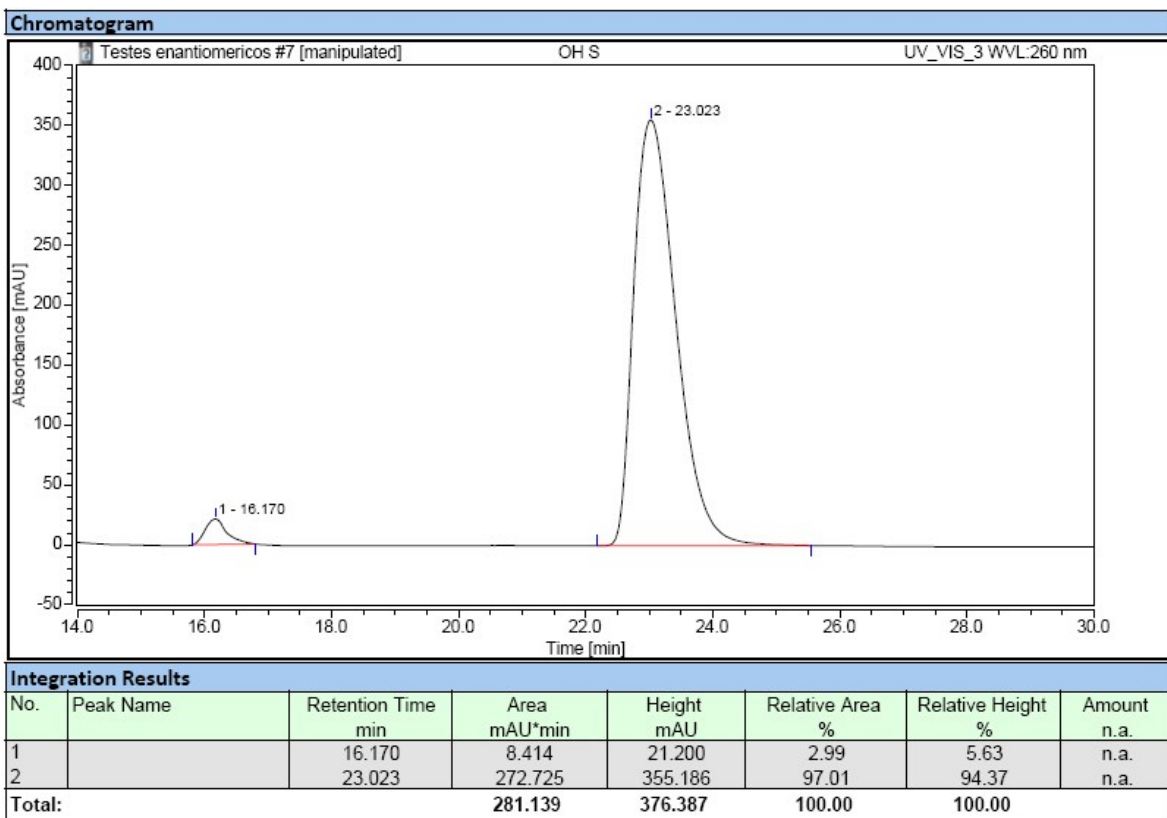

**Figure 19.** Chromatogram of (*S*)-3 obtained from enzymatic transesterification resolution.

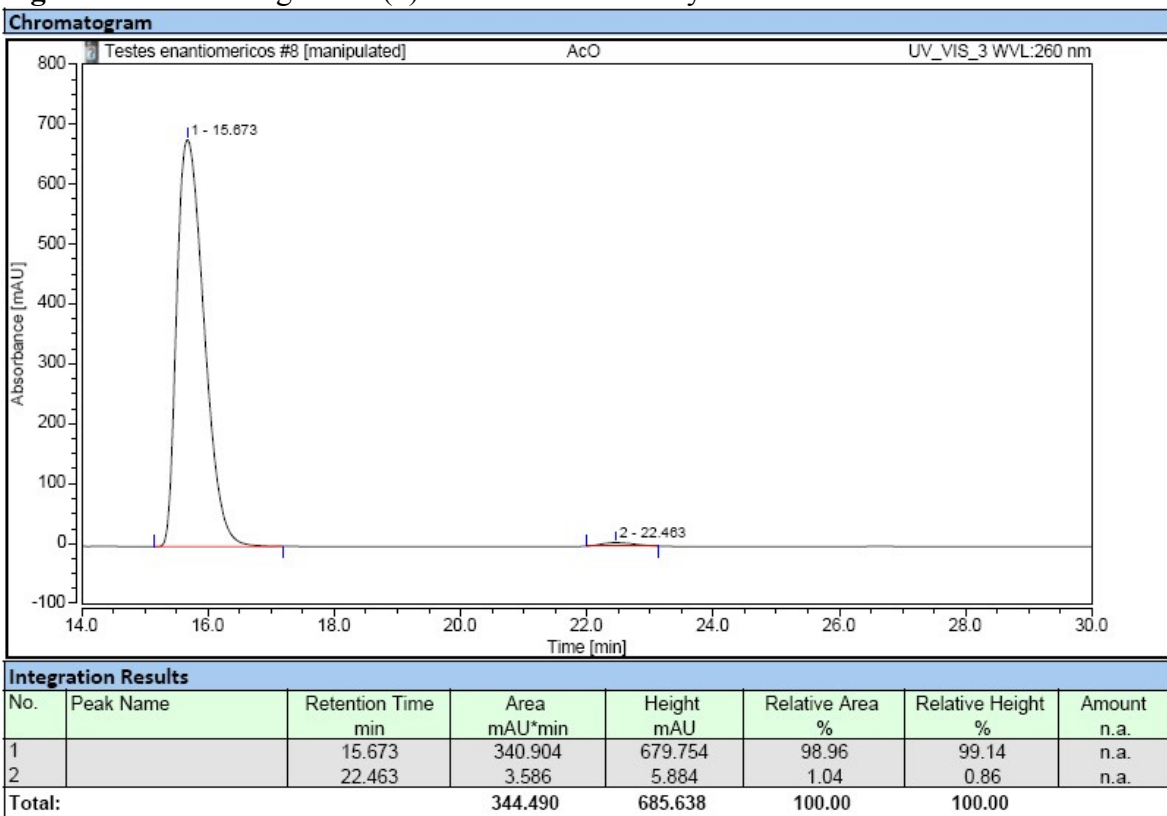

**Figure 20.** Chromatogram of (*R*)-6 obtained from enzymatic transesterification resolution.

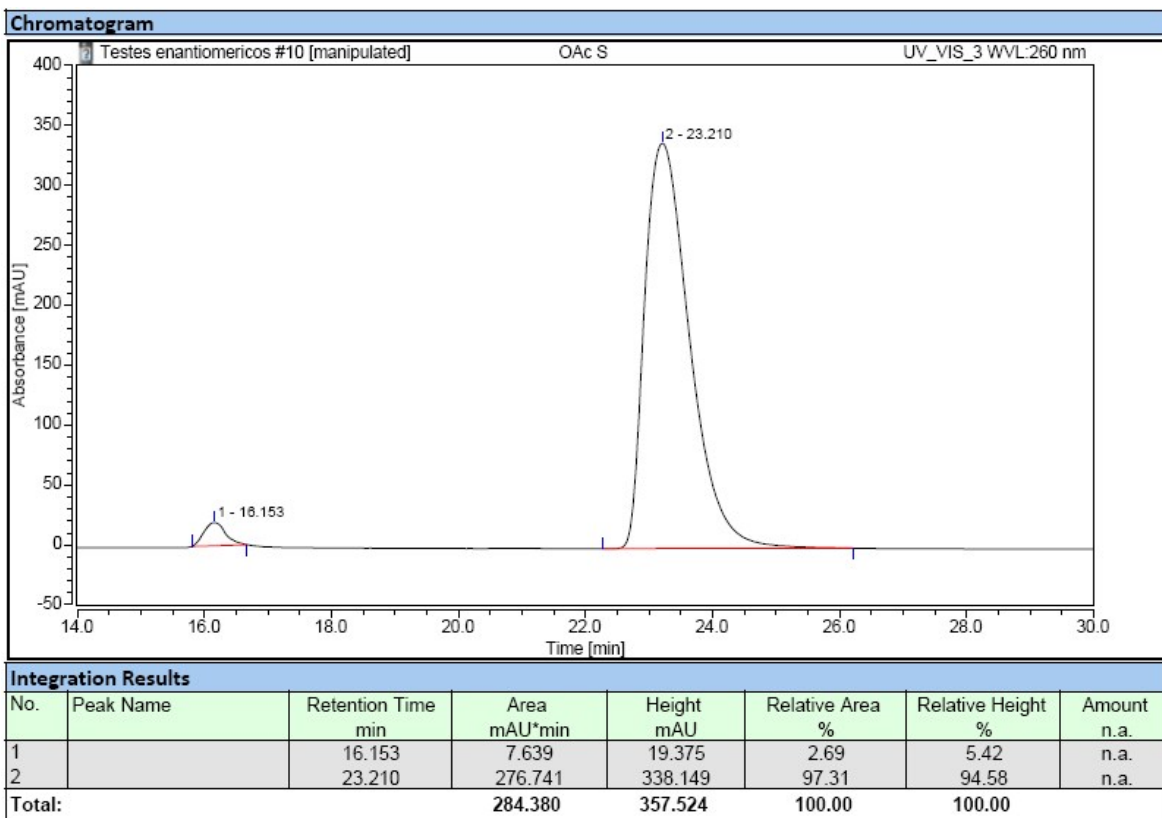

**Figure 21.** Chromatogram of (*S*)-**6** obtained from enzymatic hydrolysis resolution.
